# Supplementary material
Source: publisher figshare collection journal article supplement (https://acs.figshare.com/ndownloader/files/5357957)
Supplement: Supplementary file 1 [file 5357957]

**Demethylation of Methylated Arsenic Species during Generation of Arsanes with Tetrahydridoborate(1–) in Acidic Media**Karel Marschner<sup>\*,†,‡</sup>, Stanislav Musil<sup>†</sup>, Jiří Dědina<sup>†</sup>

<sup>†</sup>Institute of Analytical Chemistry of the CAS, v. v. i., Veveří 97, 602 00 Brno, Czech Republic

<sup>‡</sup>Department of Analytical Chemistry, Faculty of Science, Charles University in Prague, Albertov 8, 128 43 Prague, Czech Republic

\*Corresponding author; E-mail: [karel.marschner@biomed.cas.cz](mailto:karel.marschner@biomed.cas.cz)

**Abstract of Supporting Information**

Supporting Information includes details on dependences of demethylation of DMAs<sup>V</sup> and TMAs<sup>VO</sup>. Namely, it contains dependences on concentration of HCl, THB, experiments with hydrolysis coil (HC), and demethylation of TMAs<sup>VO</sup> on concentration of HNO<sub>3</sub>.

***Effect of HCl Concentration***

The dependences of arsane fractions formed from DMAs<sup>V</sup> and TMAs<sup>VO</sup> on concentration of HCl are shown in Figure S-1(a,b).

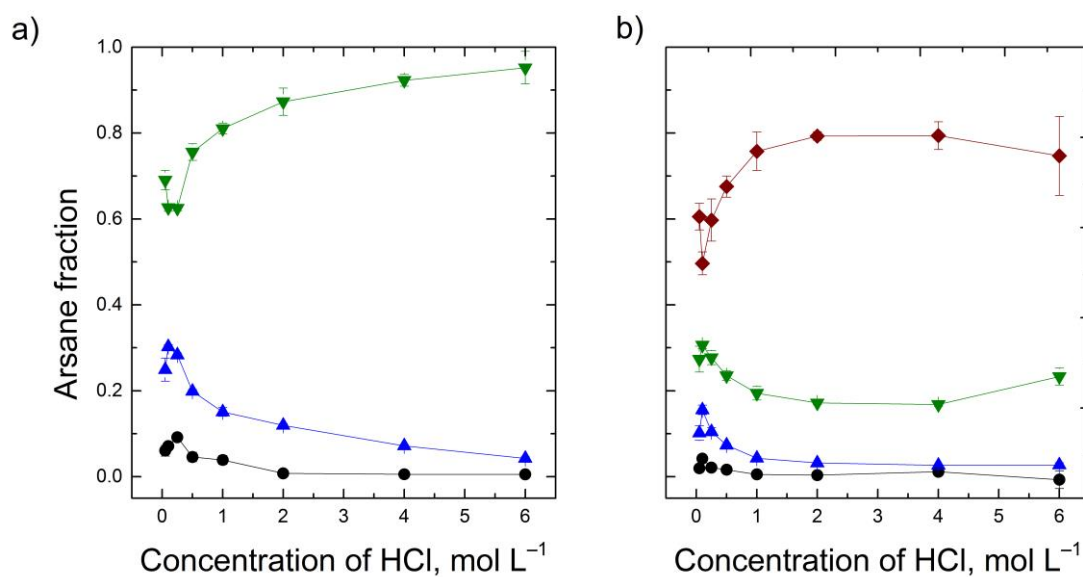

Figure S-1 Dependence of arsane fractions formed from (a) DMAs<sup>V</sup> and (b) TMAs<sup>V</sup>O on concentration of HCl; (black) ● – AsH<sub>3</sub>, (blue) ▲ – CH<sub>3</sub>AsH<sub>2</sub>, (green) ▼ – (CH<sub>3</sub>)<sub>2</sub>AsH and (brown) ◆ – (CH<sub>3</sub>)<sub>3</sub>As; concentration of DMAs<sup>V</sup> species was 0.5 ng mL<sup>-1</sup>, concentration of TMAs<sup>V</sup>O was 0.5 ng mL<sup>-1</sup> for HCl concentration range from 0.05 to 1.0 mol L<sup>-1</sup> and 2.0 ng mL<sup>-1</sup> for HCl concentration range from 2.0 to 6.0 mol L<sup>-1</sup>, 1 mL of 1% THB addition.

### ***Effect of THB Concentration***

The dependences of arsane fractions formed from DMAs<sup>V</sup> and TMAs<sup>V</sup>O on concentration of THB are shown in Figure S-2(a,b).

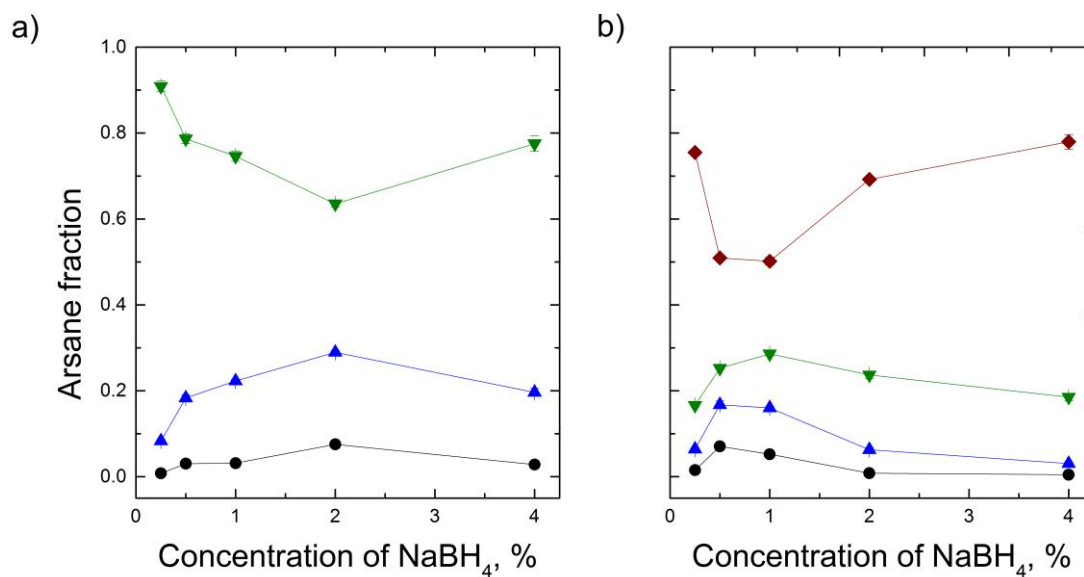

Figure S-2 Dependence of arsane fractions formed from (a) DMAs<sup>V</sup> and (b) TMAs<sup>V</sup>O on concentration of THB; (black) ● – AsH<sub>3</sub>, (blue) ▲ – CH<sub>3</sub>AsH<sub>2</sub>, (green) ▼ – (CH<sub>3</sub>)<sub>2</sub>AsH and (brown) ◆ – (CH<sub>3</sub>)<sub>3</sub>As; concentration of As species was 0.5 ng mL<sup>-1</sup>, 0.25 mol L<sup>-1</sup> HCl, 1 mL of 1% THB addition.

### ***Prereaction of THB with HCl***

The dependences of arsane fractions formed from DMAs<sup>V</sup> and TMAs<sup>V</sup>O on concentration of HCl used for prereaction are shown in Figure S-3(a,b).

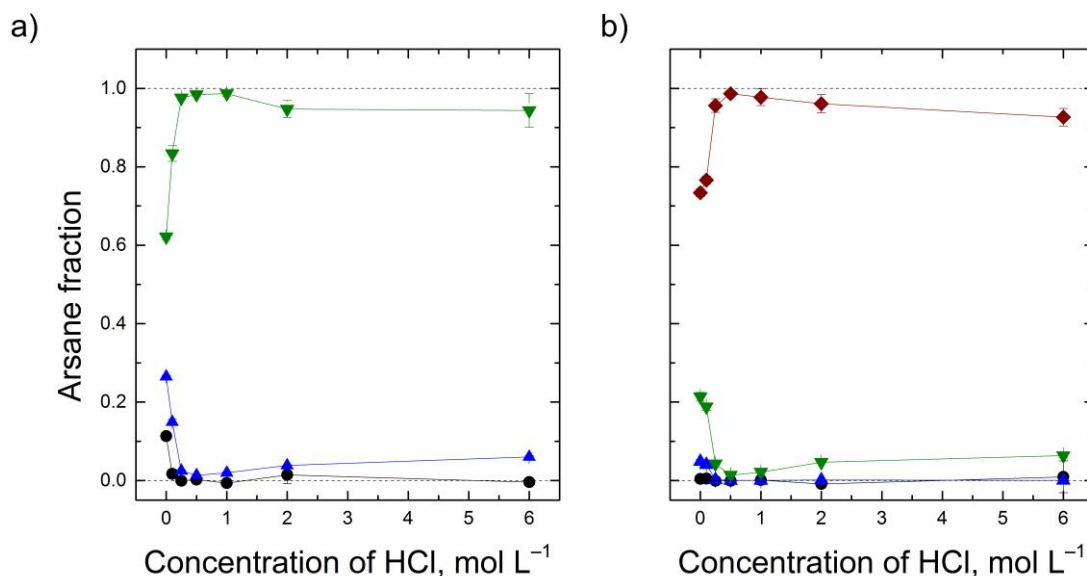

Figure S-3 Dependence of arsane fractions formed from (a) DMAs<sup>V</sup> and (b) TMAs<sup>V</sup>O on concentration of HCl used for prereaction of THB; (black) ● – AsH<sub>3</sub>, (blue) ▲ – CH<sub>3</sub>AsH<sub>2</sub>, (green) ▼ – (CH<sub>3</sub>)<sub>2</sub>AsH and (brown) ◆ – (CH<sub>3</sub>)<sub>3</sub>As; HC volume was 40 μL, concentration of DMAs<sup>V</sup> species was 0.5 ng mL<sup>-1</sup>, concentration of TMAs<sup>V</sup>O was 0.5 ng mL<sup>-1</sup> for HCl concentration range from 0 to 1.0 mol L<sup>-1</sup> and 2.0 ng mL<sup>-1</sup> for HCl concentration range from 2.0 to 6.0 mol L<sup>-1</sup>, 1 mL of 1% THB addition, 0.6 mL of 0.25 mol L<sup>-1</sup> HCl added with standard.

## Nitric Acid

The dependences of arsane fractions formed from TMAs<sup>V</sup>O on concentration of HNO<sub>3</sub> are shown in Figure S-4. The linear regression of points for (CH<sub>3</sub>)<sub>3</sub>As gives an equation  $y = -0.061x + 0.998$  with  $R^2 = 0.9902$  while for (CH<sub>3</sub>)<sub>2</sub>AsH it gives an equation  $y = 0.059x + 0.006$  with  $R^2 = 0.9902$ . This shows good linearity between demethylation and concentration of HNO<sub>3</sub>.

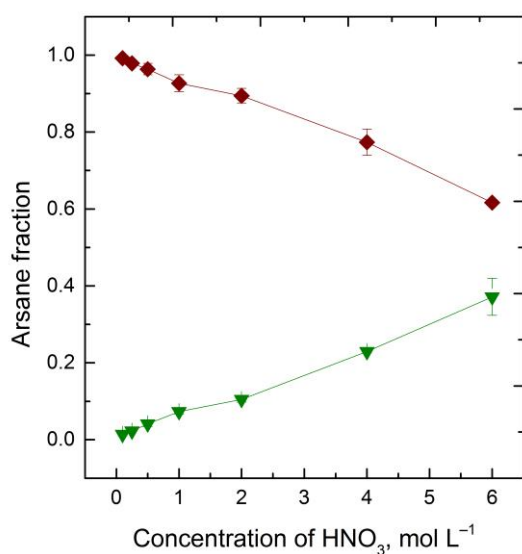

Figure S-4 Dependence of arsane fractions formed from TMA<sup>V</sup>As on concentration of HNO<sub>3</sub>; (green) ▼ – (CH<sub>3</sub>)<sub>2</sub>AsH and (brown) ♦ – (CH<sub>3</sub>)<sub>3</sub>As; concentration of DMA<sup>V</sup> species was 0.5 ng mL<sup>-1</sup>, concentration of TMA<sup>V</sup>As was 0.5 ng mL<sup>-1</sup> for HNO<sub>3</sub> concentration range from 0.1 to 1.0 mol L<sup>-1</sup> and 2.0 ng mL<sup>-1</sup> for HNO<sub>3</sub> concentration range from 2.0 to 6.0 mol L<sup>-1</sup>, 1 mL of 1% THB addition.
